# Supplementary material
Source: MDPI journal article supplement (https://www.mdpi.com/2073-4441/13/11/1454)
Supplement: s1 [file s1]

Table S1: Hazardous events checklist

| Section of SSP          | Hazardous Event                                  |
|-------------------------|--------------------------------------------------|
| Collection Issues       | Map of System                                    |
|                         | Leaks in System                                  |
|                         | Cracks in System                                 |
|                         | Recent Inspection                                |
|                         | Unused/uncapped laterals                         |
|                         | Inflow and Infiltration (collection)             |
|                         | Pipe material                                    |
|                         | Presence of cross connections                    |
|                         | Pipe proximity to water mains                    |
|                         |                                                  |
| Treatment Operations    | Manhole deterioration                            |
|                         | Inflow and Infiltration                          |
|                         | Leaks in Lagoons or Tanks                        |
|                         | Backup Power Sources                             |
|                         | Age of system                                    |
|                         | Pump Failures                                    |
|                         | Pump clogging                                    |
|                         | Pump backup power                                |
|                         | Pump overflows                                   |
|                         | Pump inflow and infiltration                     |
|                         | Disinfection inoperational                       |
|                         | Disinfection chemical requirements               |
|                         | Disinfection not meeting regulatory requirements |
|                         | Disinfection system cleanings                    |
|                         | Disinfection system clogging                     |
|                         |                                                  |
| Section of SSP          | Hazardous Event                                  |
| Operators               | Operator certification                           |
|                         | Operator training                                |
|                         | Knowledge of system                              |
|                         | Adequate record keeping                          |
|                         | Backup operator                                  |
|                         |                                                  |
| Treatment Design        | Age of system (design)                           |
|                         | Recent upgrades performed                        |
|                         | Planned upgrades                                 |
|                         | Design capacity                                  |
|                         | Operating as designed                            |
|                         | Infrastructure documentation                     |
|                         | Building construction                            |
| Reports and Regulations | SCADA System connected                           |
|                         | SCADA System alarms                              |
|                         | Effluent Quality - BOD                           |
|                         | Effluent Quality - TSS                           |
|                         | Effluent Quality - Ammonia                       |
|                         | Effluent Quality - Fecal Coliforms               |
|                         | Sampling frequency                               |
|                         | Adequate record keeping (discharge)              |
|                         | Standard operating procedures (SOPs)             |
|                         | Maintenance plans                                |
|                         | Hazardous Event                                  |
|                         | Effluent Quality - BOD (discharge)               |

|  |                                                 |
|--|-------------------------------------------------|
|  | Effluent Quality - TSS (discharge)              |
|  | Discharge to drinking water source              |
|  | Recreational activities on discharge water body |
|  | Receiving water vulnerability                   |
|  | Map of system watershed                         |
